# Supplementary material
Source: Springer Nature journal article supplement (https://www.springermedizin.de/resource/supplementary/13098_2013_300_MOESM8_ESM.pdf/9671016)

**A**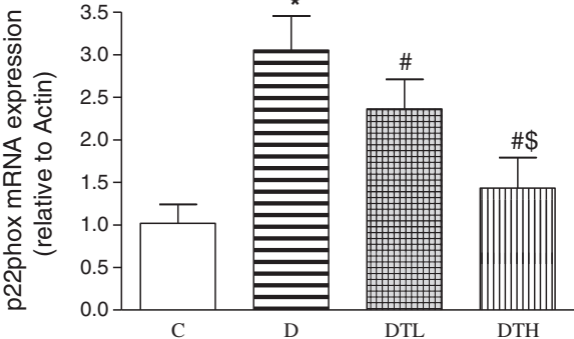**B**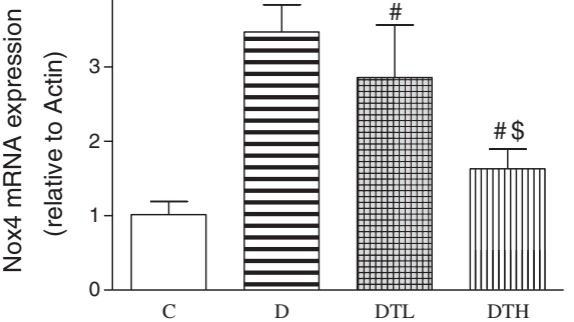

Supplement: MOESM8 [file 9671016]
